# Supplementary material for: Molecular architecture of the ErbB2 extracellular domain homodimer
Source: PubMed Central journal article supplement (PMC4359325; doi:10.18632/oncotarget.2713), 2015-01-30
Supplement: oncotarget-06-1695-s001.pdf [file oncotarget-06-1695-s001.pdf]

## SUPPLEMENTARY FIGURES

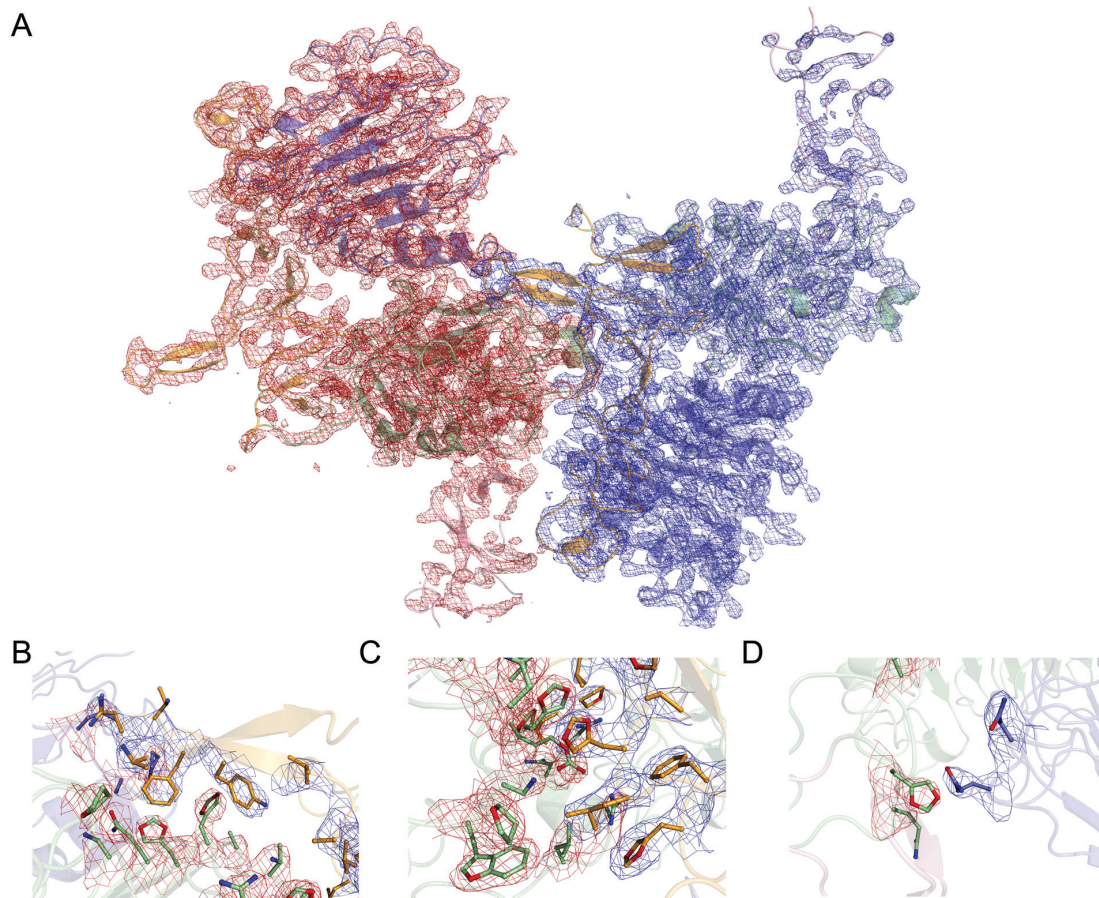

**Supplementary Figure S1: Experimental density of the ErbB2 homodimer and the dimer interface at 3.1 Å resolution.** Omit map of the ErbB2 homodimer (A) and interaction sites (B–D) is contoured at 2.0  $\sigma$ . ErbB2 is shown as cartoon, while the side chains of interacting residues are represented as colored sticks.

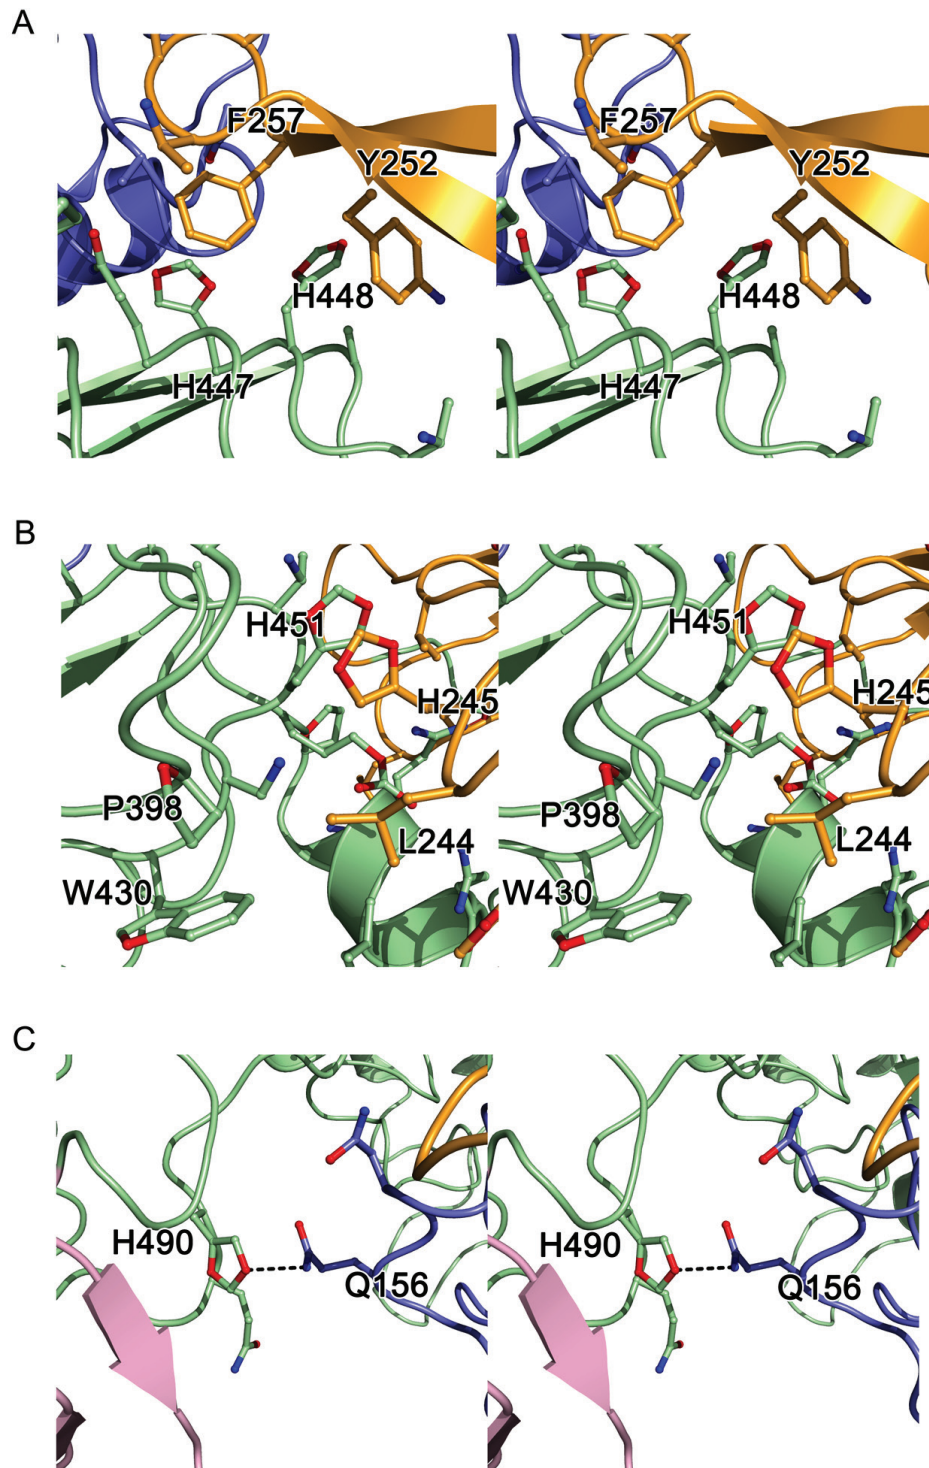

**Supplementary Figure S2: Stereo view of Interactions between the two ErbB2s in the Dimer Interface.** Only the side chains of interacting residues are shown. Dotted lines represent hydrogen bonds. **(A)** Interactions within the  $\beta$ -hairpin arm in Domain II. **(B)** Central role of H451 in Domain III. **(C)** Interaction within Domain III.

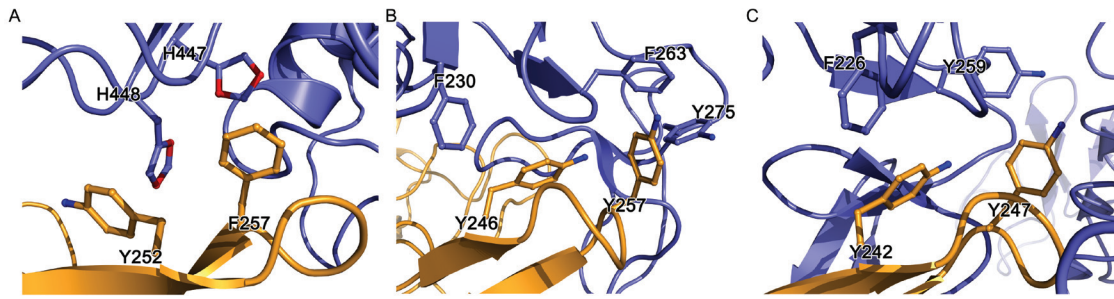

**Supplementary Figure S3: Comparison of the hydrophobically interactions among ErbBs.** ErbB2 homodimer (A) ErbB1 homodimer (B) and dEGFR homodimer (C) are shown in figure and the dimerization arm is colored yellow.
